# Supplementary material for: Single nucleotide polymorphisms are associated with strain-specific virulence differences among clinical isolates of Cryptococcus neoformans
Source: PubMed Central journal article supplement — Nat Commun. 2024 Dec 2;15:10491. doi: 10.1038/s41467-024-54729-6 (PMC11612297; doi:10.1038/s41467-024-54729-6), 2024-12-02
Supplement: 41467_2024_54729_MOESM1_ESM.pdf [file 41467_2024_54729_MOESM1_ESM.pdf]

1  
2

**Supplemental table 1: Relative fold-change from naïve control of each cytokine.**

|               | IL-4*  | IL-5* | IL-13* | IFN- $\gamma$ * | IL-1 $\beta$ * | IL-6*  | IL-12p70* | GM-CSF* | TNF- $\alpha$ * | IL-18* | Median Survival** |
|---------------|--------|-------|--------|-----------------|----------------|--------|-----------|---------|-----------------|--------|-------------------|
| Naive         | 0.00   | 0.00  | 0.00   | 0.00            | 0.00           | 0.00   | 0.00      | 0.00    | 0.00            | 0.00   | 100               |
| UgCI447       | 0.00   | 0.00  | 0.00   | 0.00            | 0.00           | 0.00   | 0.00      | 0.00    | 0.00            | 0.00   | 100               |
| UgCI377       | 0.00   | 0.00  | 0.00   | 0.00            | 0.00           | 0.00   | 0.00      | 0.00    | 0.00            | 0.00   | 77                |
| UgCI262       | 0.00   | 0.00  | 0.00   | 0.00            | 0.00           | 0.00   | -0.51     | 0.00    | 0.00            | 0.00   | 82.5              |
| UgCI438       | 0.00   | 0.00  | 0.00   | 0.00            | 0.00           | 0.00   | 0.00      | 0.00    | 0.00            | -0.90  | 100               |
| UgCI466       | 0.00   | 0.00  | 0.00   | 2.32            | 0.00           | 0.00   | 2.07      | 0.00    | 2.57            | 0.00   | 100               |
| UgCI250       | 0.00   | 0.00  | 0.00   | 14.54           | 0.00           | 2.22   | 0.00      | 1.38    | 0.00            | 0.00   | 100               |
| UgCI549       | 0.00   | 0.00  | 0.00   | 0.00            | 2.25           | 0.00   | 0.00      | 1.39    | 0.94            | 0.00   | 100               |
| UgCI332       | 0.00   | 0.00  | 0.00   | 0.00            | 0.00           | 0.00   | 0.00      | 8.78    | 0.00            | 0.00   | 77                |
| UgCI382       | 14.42  | 4.14  | 3.94   | 0.62            | 8.97           | 0.00   | 0.00      | 0.00    | 0.00            | 0.00   | 13                |
| UgCI243       | 18.47  | 0.00  | 3.02   | 0.00            | 0.00           | 0.00   | 0.00      | 0.00    | 0.00            | 0.00   | 11                |
| UgCI538       | 24.73  | 4.16  | 6.68   | 0.00            | 0.00           | 0.00   | 0.00      | 0.00    | 0.00            | -0.77  | 18                |
| UgCI450       | 21.44  | 4.77  | 4.22   | 1.25            | 12.77          | 6.76   | 0.00      | 0.00    | 2.70            | 4.37   | 10                |
| UgCI534       | 0.00   | 3.02  | 0.00   | 0.00            | 5.15           | 20.44  | 0.00      | 0.00    | 0.00            | 0.00   | 18                |
| UgCI547       | 6.12   | 2.85  | 0.00   | 0.00            | 7.56           | 17.87  | 0.00      | 0.00    | 0.00            | 0.00   | 19                |
| UgCI292       | 10.59  | 2.90  | 0.00   | 0.00            | 6.40           | 0.00   | 0.00      | 0.00    | 0.00            | 0.00   | 46                |
| UgCI300       | 18.25  | 12.49 | 6.14   | 34.66           | 12.25          | 20.46  | 0.00      | 1.74    | 3.33            | 5.94   | 15                |
| UgCI326       | 16.08  | 6.79  | 22.11  | 0.00            | 41.57          | 5.56   | 0.00      | 0.00    | 0.00            | 0.00   | 4.5               |
| UgCI468       | 41.84  | 8.75  | 9.71   | 0.00            | 12.86          | 56.12  | 0.90      | 3.88    | 3.05            | 0.00   | 8                 |
| UgCI546       | 129.60 | 55.27 | 50.24  | 0.00            | 15.63          | 26.07  | 0.00      | 2.82    | 2.46            | 1.26   | 35                |
| KN99 $\alpha$ | 40.81  | 12.01 | 5.80   | 0.00            | 13.68          | 26.00  | 0.00      | 0.00    | 0.00            | 0.00   | 0                 |
| UgCI462       | 30.01  | 6.10  | 4.08   | 99.58           | 10.69          | 87.51  | 0.00      | 4.34    | 0.00            | 2.28   | 11                |
| UgCI541       | 34.29  | 14.09 | 4.19   | 0.00            | 33.54          | 166.35 | 0.00      | 7.24    | 0.00            | 0.00   | -5                |
| UgCI357       | 49.60  | 5.83  | 7.10   | 17.35           | 13.92          | 34.69  | 104.84    | 119.05  | 24.38           | 1.78   | 0                 |
| UgCI360       | 0.00   | 0.00  | 0.00   | 267.76          | 28.34          | 42.97  | 1.05      | 3.66    | 10.19           | 3.42   | 15                |
| UgCI495       | 0.00   | 0.00  | 0.00   | 538.60          | 26.56          | 45.28  | 0.00      | 3.07    | 0.14            | 4.90   | 25.5              |
| UgCI422       | 0.00   | 5.90  | 0.00   | 835.13          | 44.26          | 81.18  | 2.12      | 0.00    | 17.43           | 32.44  | -3                |
| UgCI236       | 0.00   | 0.00  | 3.49   | 802.91          | 0.00           | 0.00   | 0.00      | 6.91    | 0.00            | 0.00   | -5                |
| UgCI535       | 0.00   | 0.00  | 0.00   | 943.10          | 28.43          | 54.53  | 1.12      | 5.04    | 9.01            | 0.00   | -1.5              |
| UgCI390       | 0.00   | 0.00  | 0.00   | 609.20          | 31.80          | 69.81  | 0.00      | 6.40    | 11.46           | 0.00   | 14                |
| UgCI247       | 0.00   | 0.00  | 3.89   | 1923.82         | 27.92          | 71.07  | 0.00      | 9.23    | 0.00            | 9.48   | -2                |

3  
4

\*Number is from three technical replicates each from five mice

\*\*Median survival from 5 or 10 mice

5 **Supplemental table 2: Ordinal categorical variables association table for ST93A GWAS**  
 6 **from variables analyzed using a proportional odds logistic mixed model.**

|                           | <b>Marker</b> | <b>Alt Freq</b> | <b>Alt Counts</b> | <b>Missing Rate</b> | <b>P value</b> | <b>beta</b> | <b>seBeta</b> |
|---------------------------|---------------|-----------------|-------------------|---------------------|----------------|-------------|---------------|
| <b>L-DOPA 30°C</b>        | 4_995956      | 0.18            | 6                 | 0.15                | 0.0005         | 1.98        | 0.63          |
|                           | 6_989732      | 0.29            | 10                | 0.15                | 0.0026         | -1.48       | 0.51          |
|                           | 12_503401     | 0.42            | 16                | 0.05                | 0.0047         | 1.24        | 0.44          |
| <b>SDS</b>                | 13_11108      | 0.15            | 6                 | 0                   | 0.0017         | 2.34        | 0.79          |
|                           | 5_836479      | 0.25            | 10                | 0                   | 0.0024         | 1.95        | 0.65          |
|                           | 1_975397      | 0.39            | 14                | 0.1                 | 0.0033         | 1.90        | 0.65          |
| <b>Growth on 37°C</b>     | 7_165873      | 0.35            | 14                | 0                   | 0.0003         | -1.75       | 0.50          |
|                           | 12_503049     | 0.16            | 6                 | 0.05                | 0.0017         | 2.03        | 0.67          |
|                           | 12_15014      | 0.39            | 14                | 0.1                 | 0.0019         | 1.68        | 0.55          |
| <b>Virulence category</b> | 9_6619        | 0.25            | 10                | 0                   | 0.0014         | 2.63        | 0.84          |
|                           | 10_15302      | 0.33            | 12                | 0.1                 | 0.0033         | -1.99       | 0.70          |

7

8 **Supplemental table 3: SNP and gene results from three GWASs**

|                             | <b>ST93 all SNPs Human GWAS</b> | <b>ST93 all SNPs Mouse GWAS</b> | <b>ST93A Mouse GWAS</b> |
|-----------------------------|---------------------------------|---------------------------------|-------------------------|
| SNPs                        | 207                             | 161                             | 108                     |
| Genes                       | 115                             | 75                              | 45                      |
| Filtered SNPs <sup>+</sup>  | 145                             | 127                             | 93                      |
| Filtered genes <sup>+</sup> | 40                              | 38                              | 32                      |
| SNPs from human and mouse   |                                 | 42                              | 34                      |
| Genes from human and mouse  |                                 | 16                              | 17                      |

9 <sup>+</sup> Gene with only one significant SNP associated with only one trait were filtered from analysis

10 **Supplemental table 4: Function of genes identified in mouse GWAS**

| <b>Gene</b> | <b>Predicted Phenotype</b>                               |
|-------------|----------------------------------------------------------|
| CNAG_00012  | Hypothetical; orthology to: oxio-reductase or NAD binder |
| CNAG_01241  | Enzyme regulator                                         |
| CNAG_01461  | Sodium/bile acid co-transporter                          |
| CNAG_01491  | Hypothetical; orthology to: ankyrin repeat protein       |
| CNAG_02176  | Hypothetical                                             |
| CNAG_02475  | Flavin-containing monooxygenase                          |
| CNAG_02487  | <i>phs1</i>                                              |
| CNAG_03387  | Hypothetical                                             |
| CNAG_04101  | Oxidation of branched chain-fatty acids                  |
| CNAG_04922  | Hypothetical                                             |
| CNAG_05185  | Hypothetical                                             |
| CNAG_05329  | <i>myo</i> -inositol 2-dehydrase                         |
| CNAG_05661  | FACT complex subunit                                     |
| CNAG_05662  | <i>itr4</i>                                              |
| CNAG_05664  | Branched chain amino acid transaminase                   |
| CNAG_05746  | Swiss dependent recombination DNA repair                 |
| CNAG_05913  | Alpha glucosidase                                        |
| CNAG_05937  | Hypothetical                                             |
| CNAG_05987  | Hypothetical                                             |
| CNAG_06169  | Hypothetical; orthology to s-glutathione dioxygenase     |
| CNAG_06256  | Hypothetical                                             |
| CNAG_06574  | <i>app1</i>                                              |
| CNAG_06876  | Alpha ketoglutarate-dependent taurine dioxygenase        |
| CNAG_07497  | Hypothetical                                             |
| CNAG_07528  | DNA binding protein; putative transposon                 |
| CNAG_07586  | Hypothetical                                             |
| CNAG_07728  | Solute carrier family 3a (Zinc transporter)              |
| CNAG_07748  | t-RNA methyltransferase                                  |
| CNAG_07837  | Hypothetical                                             |
| CNAG_07874  | Sugar transporter                                        |
| CNAG_07950  | Hypothetical                                             |
| CNAG_08006  | Hypothetical                                             |

12 **Supplemental table 5: RNAseq Transcript Data**

|                          | <b>KN99<math>\alpha</math>*</b> |       |       | <b><i>itr4</i><math>\Delta</math>*</b> |       |       |
|--------------------------|---------------------------------|-------|-------|----------------------------------------|-------|-------|
| <b><i>PHS1</i></b>       | 11.52                           | 11.70 | 11.71 | 9.04                                   | 9.07  | 8.87  |
| <b><i>CNAG_04101</i></b> | 11.84                           | 11.90 | 11.78 | 11.72                                  | 11.62 | 11.73 |
| <b><i>CNAG_05664</i></b> | 11.60                           | 11.58 | 11.65 | 0.00                                   | 0.00  | 0.00  |
| <b><i>ITR4</i></b>       | 14.69                           | 14.68 | 14.67 | 0.00                                   | 0.00  | 0.00  |
| <b><i>CNAG_05329</i></b> | 8.36                            | 8.55  | 8.34  | 8.00                                   | 7.90  | 8.17  |
| <b><i>CNAG_01241</i></b> | 10.94                           | 11.19 | 11.01 | 11.33                                  | 11.25 | 11.47 |
| <b><i>CNAG_07950</i></b> | 3.63                            | 2.25  | 2.45  | 2.48                                   | 4.07  | 2.45  |
| <b><i>CNAG_07528</i></b> | 4.63                            | 3.84  | 4.36  | 3.37                                   | 4.23  | 5.22  |
| <b><i>CNAG_06256</i></b> | -0.18                           | -0.07 | 1.45  | 2.84                                   | 2.79  | 2.71  |

13 \*Average of three technical replicates

14 **Supplemental table 6: Primers used in this study**

| <b>Primer name</b> | <b>Sequence (5'-3')</b>                | <b>Description</b> |
|--------------------|----------------------------------------|--------------------|
| <b>CX5</b>         | GTAAAACGACGGCCAG                       | M13F               |
| <b>CX6</b>         | CAGGAAACAGCTATGAC                      | M13R               |
| <b>JH8994</b>      | TGTGGATGCTGGCGGAGGATA                  | JH8994             |
| <b>CX249</b>       | GAGGCTATTCGGCTATGACTGG                 | NEO split F        |
| <b>CX2281</b>      | AGGCTGGCAAATCAAGCGTG                   | ITR4 F1            |
| <b>CX2282</b>      | CTGGCCGTCGTTTTACCGTGGTGATGGTGGTGCTCGAG | ITR4 R1            |
| <b>CX2283</b>      | GTCATAGCTGTTTCCTGACGGGGAGAAAGGCGTAGAGG | ITR4 F2            |
| <b>CX2284</b>      | CAACTTCCAATACATCATG                    | ITR4 R2            |
| <b>CX1010</b>      | CTGAGATTGCTCCCGCTAGG                   | ITR4 F3            |
| <b>CX1011</b>      | AATGAACACCACCCAAGCCA                   | ITR4 R3            |
| <b>CX1009</b>      | TGCAGTTTACATTTCCAATCGTC                | ITR4 F4            |
| <b>CX2285</b>      | CAGGTATTTGACTAGTCTGC                   | ITR4 R4            |
| <b>CX1419</b>      | TACCGAGCTCGGATCCGACTCTCACGTCGTTGTATAC  | pJAF1-ITR4 F       |
| <b>CX1420</b>      | CGTTACTAGTGGATCCTCCAAGCACCCATCACTACATG | pJAF1-ITR4 R       |
| <b>CX1800</b>      | CAACATGTCTGGATCCATGTCCACGCTTGACTACAAG  | pCXU200-ITR4 F     |
| <b>CX1801</b>      | TAGAACTAGTGGATCCAGCCTTCGACCGCTTTTCATT  | pCXU200-ITR4 R     |
| <b>CX115</b>       | CATCGCTTCCGCATTCACCTCACTC              | ITR4 QPCR F        |
| <b>CX116</b>       | TTGCCGGTACCCTTGACGATAACA               | ITR4 QPCR R        |
| <b>CX2365</b>      | CACCGATGGTTCATCCCTATAC                 | CNAG_05664 QPCR F  |
| <b>CX2366</b>      | GGACATAGCGTATCCCTTCTTC                 | CNAG_05664 QPCR R  |

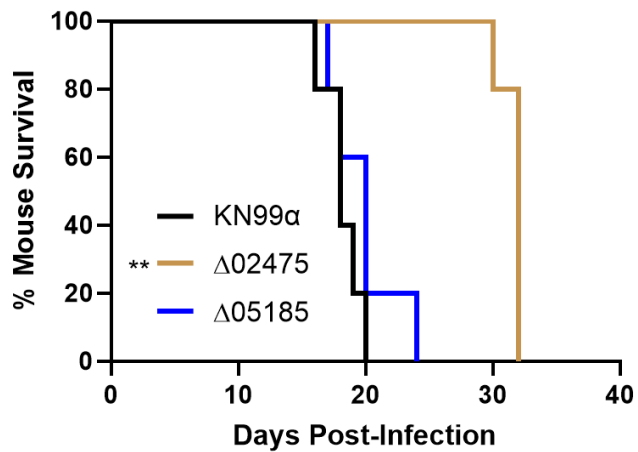

16

17 **Supplemental Figure 1: Deletion mutants identified across multiple genomic studies had**  
 18 **growth or virulence defects.** Five A/J mice were infected with  $5 \times 10^4$  cells of  $\Delta 02475$  and  
 19  $\Delta 05185$ . Significance was determined using a Gehan-Breslow-Wilcoxon test and deletion  
 20 mutants were compared to KN99 $\alpha$  (n=5; p=0.0039). Source data are provided as a Source Data  
 21 file. (\*\* =  $P < 0.01$ )

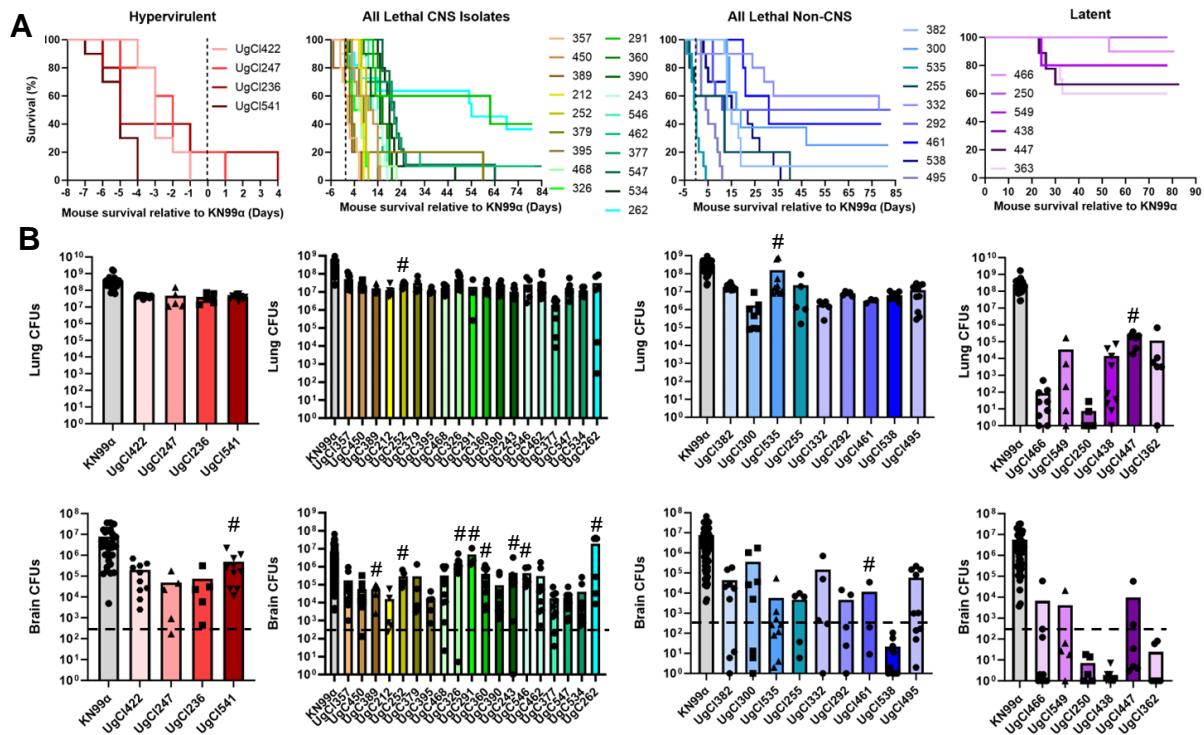

22  
 23 **Supplemental figure 2: Mice infected with clinical isolates showed four distinct virulence**  
 24 **manifestations.** Five or 10 mice were infected with  $5 \times 10^4$  cells of each clinical isolate and  
 25 monitored for 100 days. Mouse virulence was categorized into four categories, depending on  
 26 relative median survival and CFUs in the mouse brain. A) All survival curves are shown. The  
 27 survival curves were normalized to a matched KN99α control. B) Mouse CFUs were collected  
 28 from the lungs and brain of mice at terminal endpoint. For mice infected with typical CNS, typical  
 29 non-CNS, and hypervirulent isolates, CFUs are all from mice that succumbed to infection rather  
 30 than mice sacrificed at 100 days post infection. For mice infected with latent isolates, the CFUs  
 31 are from mice that survived to 100 days post infection. Significance was determined using  
 32 Kruskal-Wallis nonparametric test with Dunn's multiple comparison correction. # marks mice  
 33 that are not significantly different from the KN99α control. (n=3-10; exact P-values provided in  
 34 Source Data file). Source data are provided as a Source Data file.



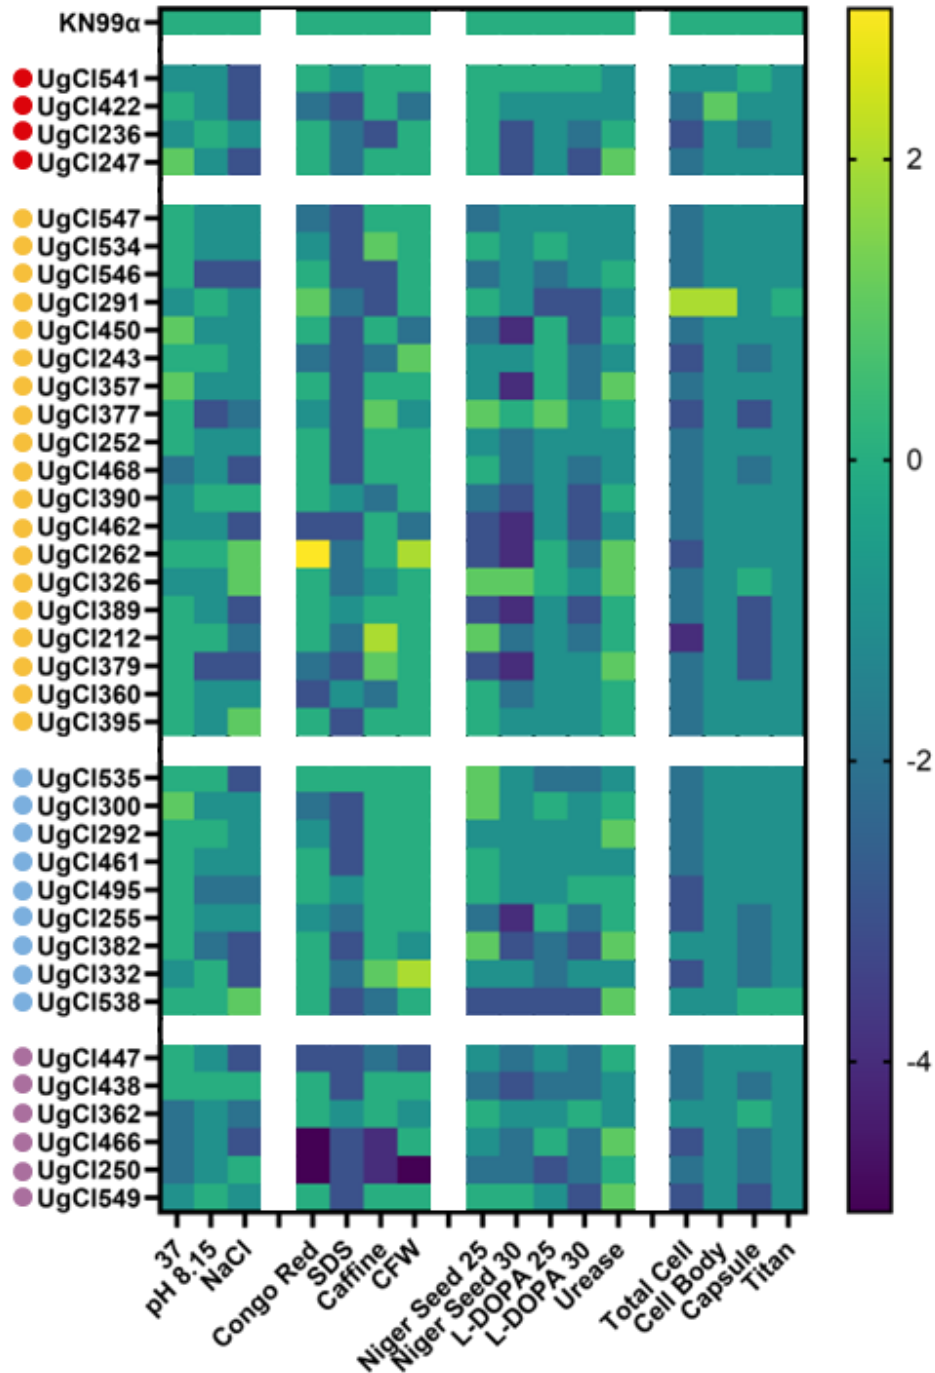

35 **Supplemental figure 3: *in vitro* phenotypes do not correlate with disease manifestation.** *in*

36 *vitro* phenotype data was collected for each clinical isolate. For cell growth stressors and cell

37 wall and membrane stressors, cells were diluted from  $10^1$ - $10^4$  and spot plated in triplicate on

38 media containing each stressor. Growth of each isolate was determined relative to growth on

39 unadulterated YPD media. Melanin production was determined by spotting  $10^6$  cells in triplicate

40 on either Niger seed or L-DOPA plates and grown at either room temperature or at 30°C. Each  
41 isolate was given a score of 1-5 depending on the shade of brown or black for each colony.  
42 Urease production was determined by plating  $10^1$ - $10^4$  cells on Christensen's urea agar and  
43 determining the dilution at which the zone of clearance occurred. Cell morphology was  
44 determined by growing cells in water supplemented with FBS for three days (62). Cells were  
45 imaged and 200 cells from each isolate was measured to determine cell body size, capsule  
46 size, total cell size, and ability to form titan cells. Isolates were assigned a numerical score  
47 depending on each size. Sample clustering was performed using an average clustering linkage  
48 method and Euclidean distance measurement (63), and no associations were observed. Four  
49 representative isolates from each virulence category were selected and grouped manually in  
50 order of virulence. The heat map was normalized to KN99 $\alpha$  and each isolate was compared to  
51 KN99 $\alpha$ . Scale bar describes relative ability to grow under stress, produce effector proteins, etc.  
52 in comparison to KN99 $\alpha$ ; i.e. "more" or "less" than KN99 $\alpha$ . In general, there were no  
53 associations between *in vitro* phenotypes and disease manifestation. Source data are provided  
54 as a Source Data file.

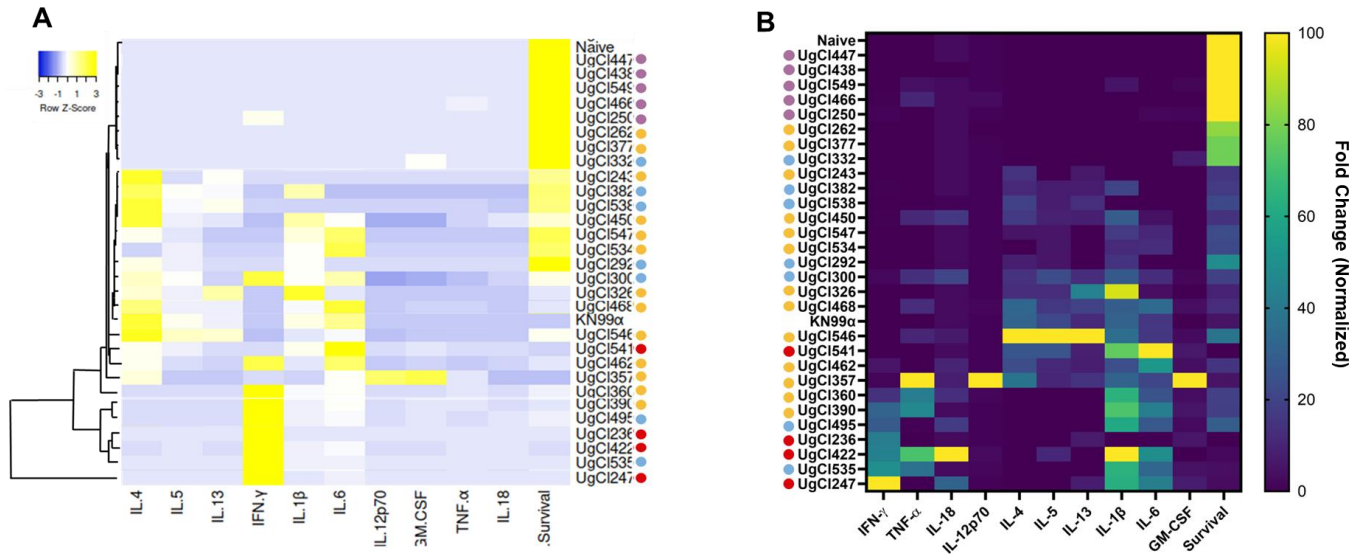

55

56 **Supplemental figure 4: *in vivo* immune response associates with disease outcome. A)**

57 Sample clustering was performed using an average clustering linkage method and Euclidean  
 58 distance measurement (63) and normalized by row. B) Heatmap describing the normalized fold  
 59 change. Mice were sacrificed on day 17 or 21 post infection, and lungs removed. The lung  
 60 supernatant was collected, and cytokine levels determined using ThermoFisher Th1/Th2  
 61 cytokine panel and a Luminex Magpix. The fold change from a naïve control was calculated for  
 62 each sample that had a significant ( $P < 0.05$ ) increase in cytokines from uninfected mice.

63 Significance was determined using Kruskal-Wallis nonparametric test with Dunn's multiple  
 64 comparison correction. Sample clustering was performed using an average clustering linkage  
 65 method and Euclidean distance measurement (63). The heat map was normalized.

66 Representative samples are shown. Median survival was normalized to KN99 $\alpha$  survival. Latent  
 67 isolates (purple) clustered with the uninfected control and showed a mostly undetectable  
 68 immune response. Typical CNS (yellow) and typical non-CNS (blue) isolates generally showed  
 69 a type 2 immune response, with increases in IL-4, IL-5, and IL-13, and clustered with KN99 $\alpha$ .

70 Hypervirulent isolates (red) generally showed an increase in type 1 cytokines, including IFN $\gamma$ , or

71 proinflammatory cytokines, including IL-1 $\beta$ , IL-6, and GM-CSF. Source data are provided as a  
72 Source Data file.

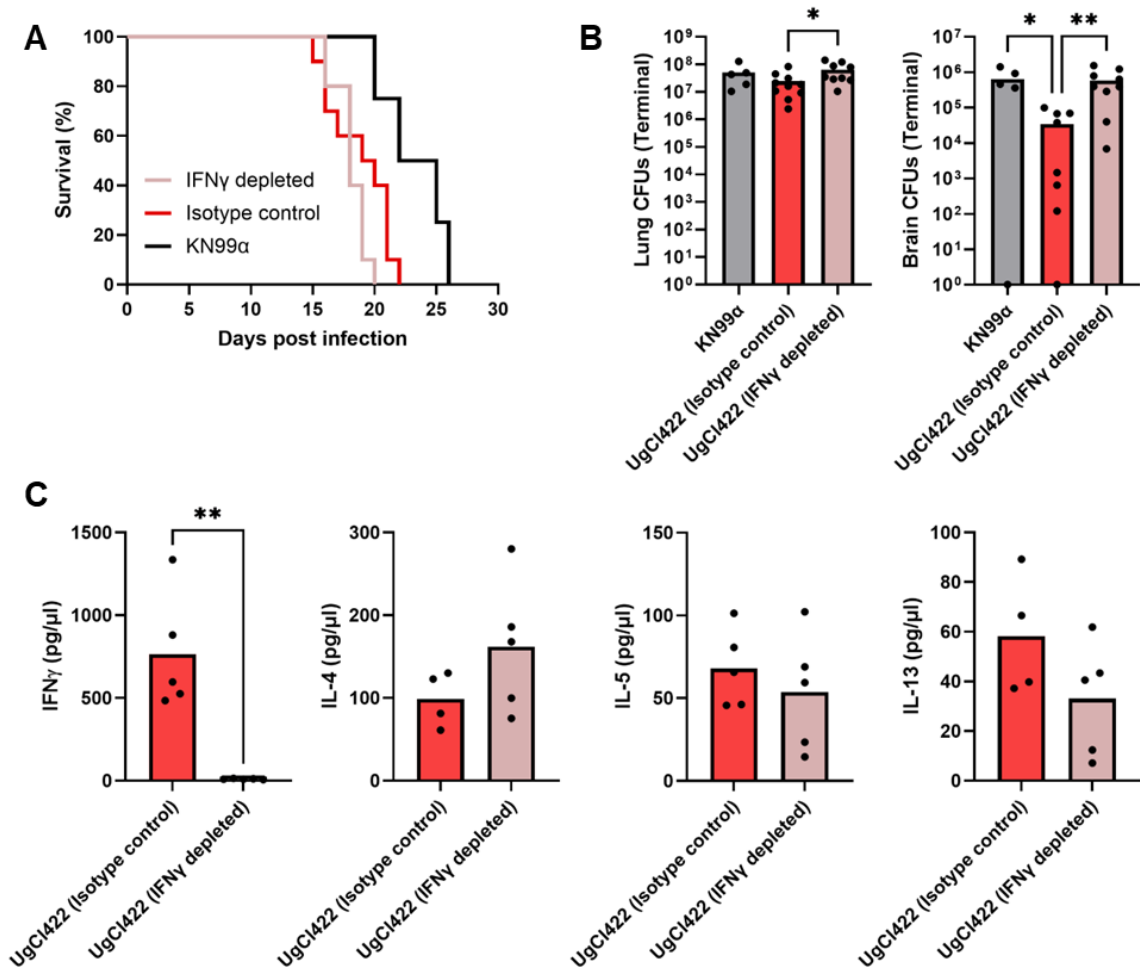

73

74 **Supplemental figure 5: IFN $\gamma$  depletion causes increased dissemination but does not alter**

75 **survival.** 10 mice were treated with IFN $\gamma$  antibody and an isotype control. A) There was no

76 impact on survival. Significance was determined with a Gehan-Breslow-Wilcoxon test and IFN $\gamma$

77 was compared to the isotype control ( $P = 0.3974$ ). B) The IFN $\gamma$  depleted mice had a significant

78 increase in lung and brain fungal burden. Significance was determined with a Kruskal-Wallis

79 nonparametric test with Dunn's multiple comparison correction ( $n=10$ ; Lung from left to right,  $P =$

80  $0.0281$ ; Brain, from left to right,  $P = 0.0076$ ;  $P = 0.0318$ ). C) IFN $\gamma$  levels were depleted in the

81 IFN $\gamma$  depletion mice, but there was no impact on type 2 immune responses. Significance was

82 determined with a Kruskal-Wallis nonparametric test with Dunn's multiple comparison correction

83 ( $n=5$ ;  $P = 0.0079$ ) Source data are provided as a Source Data file. (\* =  $P < 0.05$ ; \*\* =  $P < 0.01$ ).



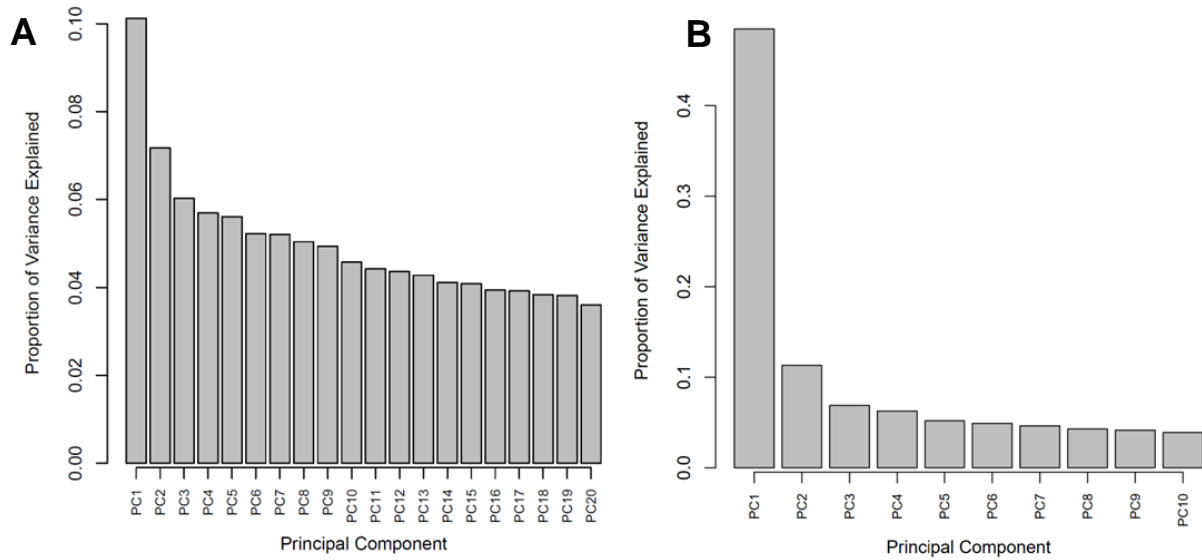

89 **Supplemental figure 7: Variance for Principal Component Analysis.** A) Scree plot for all  
90 SNPs in population. B) Scree plot for 562 SNPs predicted to influence gene coding or  
91 regulation.

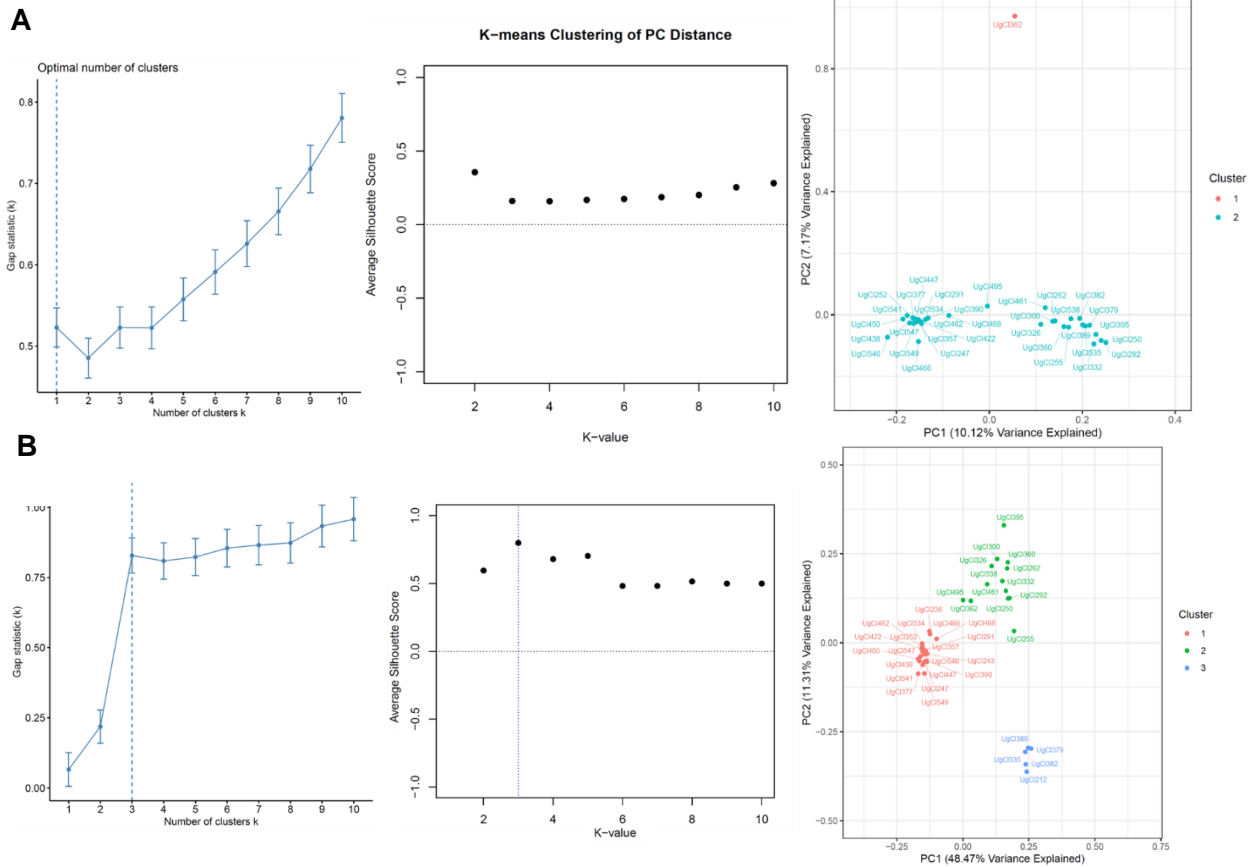

93 **Supplemental figure 8: K-means clustering revealed three clusters of isolates.** Distance  
 94 between points was calculated with Euclidean distance. Gap statistic (65) and silhouette score  
 95 (66) were used to calculate the ideal number of clusters. A) For all variates, gap statistic showed  
 96 no clusters and K-means suggested that K=2 was the optimal number of clusters. Each isolate  
 97 was colored according to the K=2 assignment. B) The coding variants found that K=3 was the  
 98 optimal number of clusters. Each isolate was colored corresponding to the K=3 assignment.



## Th1/Th2

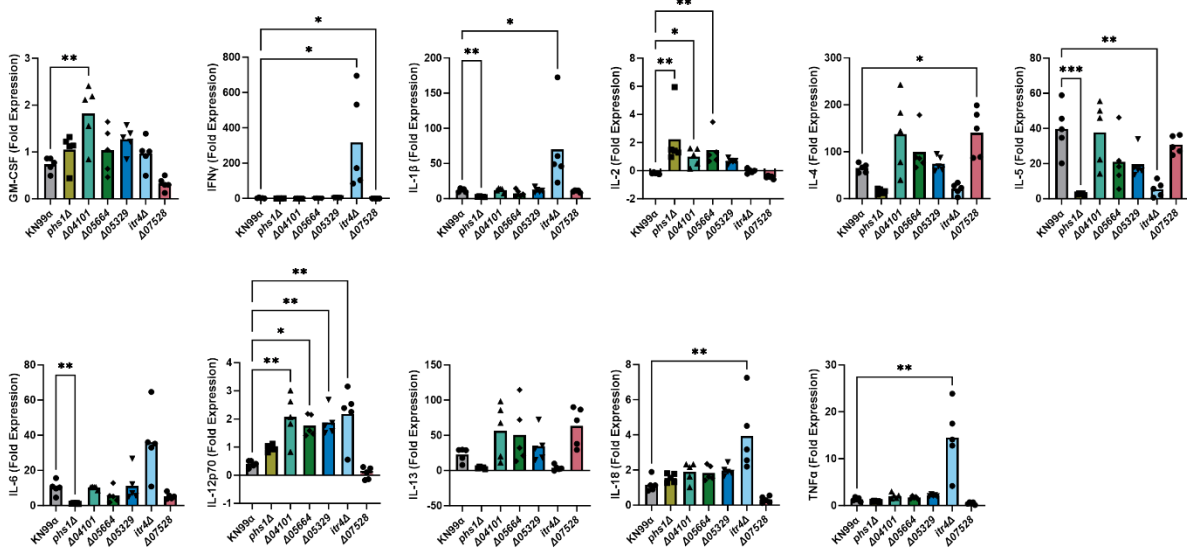

## Th9/Th17/Th22/Treg

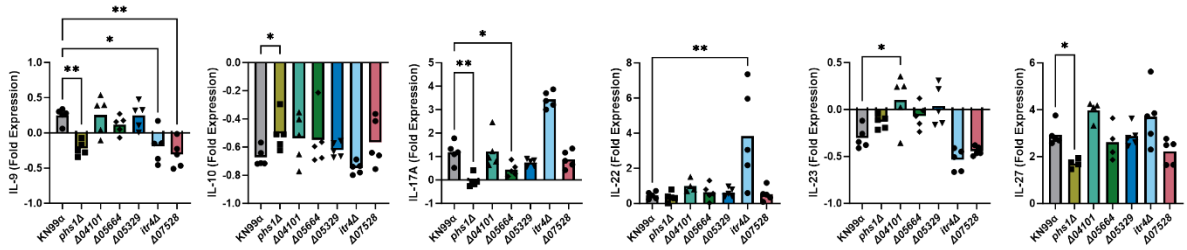

99 **Supplemental figure 9: Cytokine results from all deletion mutants.** 5 mice were sacrificed  
 100 on day 17-20 post infection and lungs removed. The lung supernatant was collected, and  
 101 cytokine levels determined. Fold expression was calculated relative to an uninfected control.  
 102 Significance was determined using a Kruskal-Wallis nonparametric test without Dunn's multiple  
 103 comparison correction (\* =  $P < 0.05$ ; \*\* =  $P < 0.01$ ; \*\*\* =  $P < 0.001$ ;  $n=5$ ; exact p-values in  
 104 Source Data file). Source data are provided as a Source Data file.

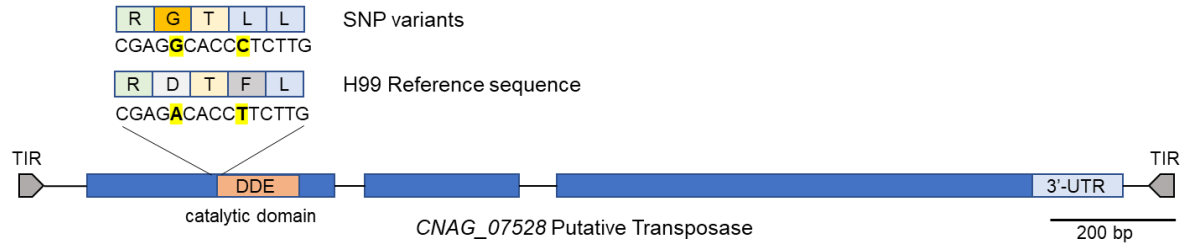

105 **Supplemental figure 10: SNP variants (highlighted) in CNAG\_07528, a putative DNA**  
 106 **transposase, associated with hypervirulence in clinical isolates.** Signature features of DNA  
 107 transposon Class II mobile element sequences are indicated including an endonucleolytic DDE  
 108 catalytic domain and putative 44-bp terminal inverted repeats (TIRs) flanking the transposase  
 109 gene.
