# Supplementary material for: Single nucleotide polymorphisms are associated with strain-specific virulence differences among clinical isolates of Cryptococcus neoformans
Source: PubMed Central journal article supplement — Nat Commun. 2024 Dec 2;15:10491. doi: 10.1038/s41467-024-54729-6 (PMC11612297; doi:10.1038/s41467-024-54729-6), 2024-12-02
Supplement: 41467_2024_54729_MOESM2_ESM.pdf [file 41467_2024_54729_MOESM2_ESM.pdf]

## **Description of Additional Supplementary Files**

Supplementary Data 1: All genes identified in the four genomic studies

Supplementary Data 2: Traits analyzed in mouse GWAS

Supplementary Data 3: Quantitative association table for ST93A GWAS from variables analyzed using a mixed linear mode

Supplementary Data 4: Variants and genes in human GWAS and both mouse GWAS
